# Supplementary material for: A recurrence-based approach for validating structural variation using long-read sequencing technology
Source: PubMed Central journal article supplement (PMC5737365; doi:10.1093/gigascience/gix061), 2017-07-19
Supplement: gix061_giga-d-17-00068_revision-2.pdf [file gix061_giga-d-17-00068_revision-2.pdf]

1  
2  
3  
4 **A recurrence based approach for validating structural variation using long-read sequencing**  
5 **technology.**  
6  
7

8  
9 Xuefang Zhao<sup>1</sup>, Alexandra M. Weber<sup>1</sup>, and Ryan E. Mills<sup>1,2,#</sup>  
10  
11

12 <sup>1</sup>Department of Computational Medicine and Bioinformatics, University of Michigan, Ann Arbor, MI,  
13 48109, USA, <sup>2</sup>Department of Neurology, University of Michigan, Ann Arbor, MI, 48109, USA,  
14  
15

16 <sup>3</sup>Veterans Affairs Medical Center, Ann Arbor, MI, 48105, USA, <sup>4</sup>Department of Human Genetics,  
17 University of Michigan, Ann Arbor, MI, 48109, USA  
18  
19

20  
21 #Corresponding author: remills@umich.edu  
22  
23  
24  
25  
26  
27  
28  
29  
30  
31  
32  
33  
34  
35  
36  
37  
38  
39  
40  
41  
42  
43  
44  
45  
46  
47  
48  
49  
50  
51  
52  
53  
54  
55  
56  
57  
58  
59  
60  
61  
62  
63  
64  
65

1  
2  
3  
4  
5  
6  
7  
8  
9  
10  
11  
12  
13  
14  
15  
16  
17  
18  
19  
20  
21  
22  
23  
24  
25  
26  
27  
28  
29  
30  
31  
32  
33  
34  
35  
36  
37  
38  
39  
40  
41  
42  
43  
44  
45  
46  
47  
48  
49  
50  
51  
52  
53  
54  
55  
56  
57  
58  
59  
60  
61  
62  
63  
64  
65

# ABSTRACT

## Background

Although numerous algorithms have been developed to identify structural variation (SVs) in genomic sequences, there is a dearth of approaches that can be used to evaluate their results. This is significant, as the accurate identification of structural variation is still an outstanding but important problem in genomics. The emergence of new sequencing technologies that generate longer sequence reads can, in theory, provide direct evidence for all types of SVs regardless of the length of region through which it spans. However, current efforts to use these data in this manner require the use of large computational resources to assemble these sequences as well as visual inspection of each region.

## Results

Here we present VaPoR, a highly efficient algorithm that autonomously validates large SV sets using long read sequencing data. We assessed the performance of VaPoR on SVs in both simulated and real genomes and report a high-fidelity rate for overall accuracy across different levels of sequence depths. We show that VaPoR can interrogate a much larger range of SVs while still matching existing methods in terms of false positive validations and providing additional features considering breakpoint precision and predicted genotype. We further show that VaPoR can run quickly and efficiency without requiring a large processing or assembly pipeline.

## Conclusions

VaPoR provides a long read based validation approach for genomic SVs that requires relatively low read depth and computing resources and thus will provide utility with targeted or low-pass sequencing coverage for accurate SV assessment. The VaPoR Software is available at: <https://github.com/mills-lab/vapor>.

**Keywords:** structural variation, copy number variation, sequence analysis

## BACKGROUND

Structural variants (SVs) are one of the major forms of genetic variation in humans and have been revealed to play important roles in numerous diseases including cancers and neurological disorders [1, 2]. Various approaches have been developed and applied to paired-end sequencing to detect SVs in whole genomes [3-6], however individual algorithms often exhibit complementary strengths that sometimes lead to disagreements as to the precise structure of the underlying variant. The emergence of long read sequencing technology, such as Single Molecule Real-Time (SMRT) sequencing from Pacific Biosciences (PacBio) [7, 8], can deliver reads ranging from several to hundreds of kilobases and provide direct evidence for the presence of an SV. Current strategies make use of de novo assembly to create long contigs with minimized error rate [9-11], and then predict SVs, typically with single base resolution, through direct comparison of the assembly against the reference. Though such approaches are powerful, they require both a very high sequencing depth and significant computing power and are currently impracticable for many ongoing research studies.

The additional information obtained from using long reads can still be leveraged to improve variant calling, however. Indeed, such approaches have already been implemented to combine high depth Illumina sequencing with lower depth PacBio reads to improve error correction and variant calling in the context of *de novo* genome assembly [12]. With structural variation, the current state of the art is to use long reads to manually assess potential SVs using subsequent recurrence (dot) plots [13], where the sequences are compared against the reference through a fixed size sliding window (k-mer) and the matches are plotted for visual inspection. The k-mer method is of higher robustness compared to direct sequences comparison [14], which is why these types of dot plots have been used for decades to examine the specific features of sequence alignments [15]. However, they require manual curation and, coupled with the computational costs of sequence assembly, are time-consuming and inefficient at scale for the high throughput validation of large sets of SVs.

Here, we present a high-speed long read based assessment tool, VaPoR, that investigates and scores each provided SV prediction by autonomously analyzing the recurrence of k-mers within a local read against both an unmodified reference sequence at that loci as well as a rearranged reference pertaining to the predicted SV structure. A positive score of each read on the altered reference, normalized against the score of the read on the original reference, supports the predicted structure. A baseline model is

1  
2  
3  
4 constructed as well by interrogating the reference sequence against itself at the query location. We show  
5 that our approach can quickly and accurately distinguish true from false positive predictions of both  
6 simple and complex SVs as well as their underlying genotypes and is also able to assess the breakpoint  
7 accuracy of individual algorithms.  
8  
9  
10

## 11 **DATA DESCRIPTION**

### 12 *Simulated Data:*

13  
14  
15  
16 Non-overlapping simple deletions, inversions, insertions and duplications as well as complex structural  
17 variants as previously categorized [5] were independently incorporated into GRCh38 in both  
18 heterozygous and homozygous states, excluding regions of the genome that are known to be difficult to  
19 assess as described from the ENCODE project [16]. Detailed descriptions of each simulated SV types  
20 simulated are summarized in Supplementary Tables 1- 2. We applied PBSIM (PBSIM,  
21 RRID:SCR\_002512) [17] to simulate the modified reference sequences to different read depth ranging  
22 from 2X to 70X with a parameters difference-ratio of 5:75:20, length-mean 12000, accuracy-mean 0.85  
23 and *model\_qc model\_qc\_clr*. Simulated data can be obtained from <https://umich.box.com/v/vapor> and  
24 via the *GigaScience* repository GigaDB [18].  
25  
26  
27  
28  
29  
30  
31  
32  
33  
34  
35  
36  
37  
38

### 39 *Real Data*

40  
41  
42 We applied VaPoR to a set of diverse samples (HG00513 from CHS, HG00731 and HG00732 from  
43 PUR, NA19238 and NA19239 from YRI) that were initially sequenced by the 1000 Genomes Project  
44 and for which a high-quality set of SVs were reported in the final phase of the project [19]. These  
45 samples were recently re-sequenced using PacBio to 20X coverage and therefore provides a platform for  
46 assessing VaPoR on known data. The 1000 Genomes Project (1KGP) Phase 3 data were obtained from  
47 [ftp://ftp-trace.ncbi.nih.gov/1000genomes/ftp/phase3/integrated\\_sv\\_map/](ftp://ftp-trace.ncbi.nih.gov/1000genomes/ftp/phase3/integrated_sv_map/) and lifted over to GRCh38.  
48  
49  
50  
51  
52  
53 PacBio sequence data were obtained from  
54 [http://ftp.1000genomes.ebi.ac.uk/vol1/ftp/data\\_collections/hgsv\\_sv\\_discovery/](http://ftp.1000genomes.ebi.ac.uk/vol1/ftp/data_collections/hgsv_sv_discovery/).  
55  
56  
57  
58  
59  
60  
61  
62  
63  
64  
65

1  
2  
3  
4 We have also compared VaPoR against the long read validation approach developed by Layer et al. [3],  
5 which requires both PacBio and Moleculo long sequences for full evaluation of SVs. These comparisons  
6 made use of NA12878, one of few samples that have been sequenced with various technologies  
7 including Illumina NGS, PacBio and Moleculo with a truth SV set included in the 1KGP Phase 3 report.  
8 The software for the long-read validation approach was obtained from: [https://github.com/hall-lab/long-](https://github.com/hall-lab/long-read-validation)  
9 [read-validation](https://github.com/hall-lab/long-read-validation). The PacBio and the Moleculo sequences of this individual were obtained from :  
10 [http://ftp.1000genomes.ebi.ac.uk/vol1/ftp/technical/working/20131209\\_na12878\\_pacbio/si/](http://ftp.1000genomes.ebi.ac.uk/vol1/ftp/technical/working/20131209_na12878_pacbio/si/) and  
11 [http://ftp.1000genomes.ebi.ac.uk/vol1/ftp/phase3/integrated\\_sv\\_map/supporting/NA12878/moleculo/ali-](http://ftp.1000genomes.ebi.ac.uk/vol1/ftp/phase3/integrated_sv_map/supporting/NA12878/moleculo/alignment/)  
12 [gnment/](http://ftp.1000genomes.ebi.ac.uk/vol1/ftp/phase3/integrated_sv_map/supporting/NA12878/moleculo/alignment/) respectively.  
13  
14  
15  
16  
17  
18  
19  
20  
21  
22  
23  
24

## 25 RESULTS

26  
27 We assessed the performance of VaPoR on both simulated sequences and real genomes from the 1000  
28 Genomes Project to assess the following characteristics: sensitivity and false discovery rate on  
29 validating structural variants in simple and complex structures; sensitivity of VaPoR on validating  
30 different levels of predicted breakpoint efficacy; stratification of VaPoR scores by genotype; and time  
31 and computational cost of VaPoR.  
32  
33  
34  
35  
36  
37

### 38 VaPoR on Simulated Data

39  
40 We applied VaPoR to simulated simple deletions, inversions, insertions and duplications as well as  
41 complex structural variants and first assessed the proportion of SVs that VaPoR is capable of  
42 interrogating (i.e. passed VaPoR QC). We found that VaPoR can successfully evaluate >80% of  
43 insertions, >85% deletion-duplications and >90% SVs in all other categories when the read depth is 10X  
44 or higher. We then assessed the sensitivity and false discovery rate (FDR) at different VaPoR score  
45 cutoffs and found that a sensitivity >90% is achieved for most SV types across a wide range of read  
46 depths while maintaining a false discovery rate <10% at a VaPoR score cutoff of 0.15 (Figure 2,  
47 Supplementary Figures 1-2). We further observed that there were no significant changes of sensitivity or  
48 false discovery rate once the read depth was at or above 20X and is consistent across different SV types  
49 (Figure 3, Supplementary Table 3).  
50  
51  
52  
53  
54  
55  
56  
57  
58  
59  
60  
61  
62  
63  
64  
65

## VaPoR on 1000 Genomes Project Samples

We next examined SVs reported on chr1 of 5 diverse individuals from the 1000 Genomes Project [20] to assess the sensitivity of VaPoR on real genomes (Table 1), with 197 – 258 SVs reported per individual in Phase 3 of the project. We first observed that >95% of deletions and insertions could be successfully evaluated by VaPoR. For inversions, there were a limited number of events reported but at maximum only 1 event failed the VaPoR quality control per individual. Moreover, we observed 3-8% deletions and insertions that are 10Kb or larger in size across the individuals. Such events were rarely fully covered by long sequences according their length distribution (Supplementary Figure 3) and were assessed through the ‘large variants assessment’ module implemented in VaPoR (Methods, Supplementary Figure 4), out of which 100% were successfully evaluated. A sensitivity of >90% was achieved for deletions (Figure 4a) and >80% for insertions (Figure 4b) at the recommended cutoff of 0.15.

To examine the false validation rate of VaPoR, we modified reported events on chr2 to appear at the same coordinates on chr1 and assessed them as though they were real events using the same sequence data set. VaPoR validated very few deletions or inversion and <10% of insertions. We further compared VaPoR against a long-read validation approach developed in conjunction with Lumpy (Lumpy, RRID:SCR\_003253) [3] using SVs on chr1 of NA12878 reported by the 1kGP Phase 3. VaPoR achieved a sensitivity of 72% for deletions and 86% for insertions, while the Lumpy-associated approach was only able to assess 11% and 0% respectively. Both approaches exhibited a very low false validation rate when synthetically assigning the variants to chr2, with 0 for all SV types by the Layer et al approach and varying between 0 and 2.5% for VaPoR (Supplementary Table 4).

## SV breakpoint validation and accuracy

One of the outstanding challenges of SV discovery is the precise determination of its location at nucleotide resolution. Many short-read algorithms can correctly identify the presence of an SV but report uncertainty at the breakpoints, as can be observed by the reported median confidence intervals of +/-85bp across all events in the 1KGP Phase 3 set [19]. We therefore assessed the performance of VaPoR to validate SVs with varying degrees of breakpoint accuracy by artificially shifting the coordinates of simulated SVs (Supplementary Figures 5-6) and the Phase 3 SVs from the 1000 Genomes samples (Figure 4c,d) by -1000 to 1000 base pairs and re-assessing the new positions with VaPoR.

1  
2  
3  
4 Using default parameters, VaPoR exhibited a robust validation score up to approximately 200bp overall,  
5  
6 with some slight differences observed between different SV types. We note that this delineation is  
7  
8 partially dependent on the length of the flanking sequence selected, as larger flanking sequences would  
9  
10 allow for larger breakpoint offsets depending on user preference. SVs with confidence intervals  
11  
12 bounding expected breakpoint locations can be also be systematically assessed using subsequent VaPoR  
13  
14 application with offset breakpoints to identify the positions that exhibit the highest score.

### 15 16 **Discrimination of SV types and genotypes**

17  
18  
19 We identified a small number of SVs in the high quality 1000 Genomes set that did not validate with  
20  
21 VaPoR. Previous studies have shown that complex rearrangements are often misclassified as simple  
22  
23 structural changes [5, 13], and indeed upon manual inspection these appeared to consist of multiple  
24  
25 connected rearrangements. For example, we observed a reported inversion in HG00513 and NA19239  
26  
27 on chromosome 1 (chr1:239952707-239953529) that was invalidated by VaPoR; an investigation into  
28  
29 the long-reads aligned in the region showed the signature of an inverted duplication (Figure 5a) which,  
30  
31 when incorporated into a modified reference that location, matched almost exactly with the read  
32  
33 sequence (Figure 5b).

34  
35 We further explored the distribution of VaPoR scores for this region and others across the sample set  
36  
37 and observed clear delineations between allelic copy number when fitted with a Gaussian mixture model  
38  
39 allowing for the generation of genotype likelihoods for each site (Figure 5c). These tracked with our  
40  
41 expected genotypes for the inverted duplication on chr1 across the 5 individuals queried while showing  
42  
43 no support for the originally predicted inversion (Figure 5d). This shows that VaPoR is not only able to  
44  
45 accurately genotype variants but can also distinguish between similar but distinct SV predictions in the  
46  
47 same region.

48  
49 Using these data, we implemented a genotyping module as an option for users to assess predicted  
50  
51 genotypes with those derived using long reads. We compared the genotype of deletions and inversions  
52  
53 reported by the 1000 Genomes Phase 3 to the VaPoR genotypes at those loci and observed a non-  
54  
55 reference genotype concordance of 0.83 (Supplementary Table 5). The manual visual inspection of  
56  
57 regions with discordant genotypes using both the Illumina WGS and PacBio sequence alignments in  
58  
59 IGV [21] showed the VaPoR genotypes to be consistently correct in such cases. An updated non-  
60  
61  
62  
63  
64  
65

1  
2  
3  
4 reference genotype concordance of 0.95 was achieved after we integrated these manual inspections into  
5  
6 the 1000 Genomes set.  
7  
8

## 9 **Runtime and efficiency**

10  
11 The computation runtime of VaPoR was assessed using 2 Intel Xeon Intel Xeon E7-4860 processors  
12 with 4GB RAM each on both simulated and real genomes. The runtime of simulated event was observed  
13 to increase linearly with read depth (Supplementary Figure 7). For events sequenced up to 20X, VaPoR  
14 takes ~3 seconds to assess a simple SV and ~5s for a complex event. The assessment of real samples  
15 sequenced at 20X required ~1.4 seconds to assess a simple deletion or insertion and ~6 seconds for an  
16 inversion (Supplementary Table 6), with a full genome analysis consisting of ~3,000 SVs larger than  
17 50bp taking 2 CPU hours on average.  
18  
19  
20  
21  
22  
23  
24  
25  
26  
27  
28

## 29 **DISCUSSION**

30  
31  
32 Here we present an automated assessment approach, named VaPoR, for exploring various features of  
33 predicted genomic structural variants using long read sequencing data. VaPoR directly compares the  
34 input reads with the reference sequences with relatively straightforward computational metrics, thus  
35 achieving high efficiency in both run time and computing cost. VaPoR exhibits high sensitivity and  
36 specificity in both simulated and real genomes, with the capability of discriminating partially resolved  
37 SVs either consisting of similar but incorrect SV types at the same location or correct SVs with offset  
38 breakpoints. Furthermore, we show that VaPoR performs well at low read depths (5-10X), thus  
39 providing the option of systematically assessing large-scale SVs with a lower sequencing cost.  
40  
41  
42  
43  
44  
45  
46  
47  
48  
49  
50  
51  
52  
53  
54  
55  
56  
57  
58  
59  
60  
61  
62  
63  
64  
65



1  
2  
3  
4  
5  
6  
7  
8  
9  
10  
11  
12  
13  
14  
15  
16  
17  
18  
19  
20  
21  
22  
23  
24  
25  
26  
27  
28  
29  
30  
31  
32  
33  
34  
35  
36  
37  
38  
39  
40  
41  
42  
43  
44  
45  
46  
47  
48  
49  
50  
51  
52  
53  
54  
55  
56  
57  
58  
59  
60  
61  
62  
63  
64  
65

## METHODS

### VaPoR Workflow

VaPoR takes in aligned sequence reads in BAM format and predicted SVs (>50bp) in various formats including VCF and BED. SVs are evaluated by comparing long reads that traverse the reported position of the event against reference sequences in two formats: (a) the original human reference to which the sample is aligned and (b) a modified reference sequence altered to match the predicted structural rearrangement. A recurrence matrix is then derived by sliding a fixed-size window (k-mer) with 1bp step through each read to mark positions where the read sequence and reference are identical. The matching patterns are then assessed as to the validity of the SV and a validation score is reported. Given the large variance of SVs lengths, each SV is stratified into one of two groups: smaller SVs that can be completely encompassed within multiple (>10 by default) long sequences, and larger events that are too big to fall within individual reads but for which the breakpoint regions can be assessed. Each class of SV is interrogated with different statistical models, as described below. The VaPoR workflow is briefly summarized in Figure 1.

#### *Small Variants Assessment:*

For an SV  $k$  in sample  $s$  that is covered by  $n$  reads, the recurrence matrix between each read and the reference sequences in original ( $R_o$ ) and altered ( $R_a$ ) format is calculated in the form of a dot plot. For each record  $i$  that corresponds to the fixed-size sequence window position and each format  $R_x \in (R_o, R_a)$ , we define a distance  $d_{i,k,s,Rx}$  as the vertical distance between each record ( $X=x_{i,k,s,Rx}$ ,  $Y=y_{i,k,s,Rx}$ ) in matrix  $x$  and the diagonal ( $X=x_{i,k,s,Rx}$ ,  $Y=x_{i,k,s,Rx}$ ) such that  $d_{i,k,s,Rx} = \text{abs}(x_{i,k,s,Rx} - y_{i,k,s,Rx})$ , and the average distance of all records would be assigned as the score of each matrix:

$$\text{Score}_{k,s,Rx} = \sum_{i=1}^m d_{i,k,s,Rx} / m,$$

where  $m$  is the total number of records in the matrix. Sequences that share higher identity with the read will have a lower  $Score_{k,s,Rx}$ , such that the score of each read is normalized as:

$$Score_{k,s,R} = Score_{k,s,R_o} / Score_{k,s,R_a} - 1,$$

where a positive  $Score_{k,s,R}$  represents the superiority of the predicted structure versus the original and vice versa for negative  $Score_{k,s,R}$ . There exists one exceptional case where a duplicated structure resides within the predicted SV such that the predicted structure would show higher  $Score_{k,s,R}$  due to the multi-alignment of duplicated segments. To correct for these intrinsic duplications, VaPoR adopts the directed distance  $d_{i,k,s,Rx} = x_{i,k,s,Rx} - y_{i,k,s,Rx}$  instead, and take the absolute value of their aggregation, such that the distance contributed by centrosymmetric duplicated segments would offset each other.

$$Score_{k,s,Rx}' = abs(\sum_{i=1}^m x_{i,k,s,Rx} - y_{i,k,s,Rx}) / m,$$

#### Large Variants Assessment:

For larger SVs where there are few, if any, long reads that can transverse the predicted SV, VaPoR assesses the quality of each predicted junction instead using:

$$Score_{k,s,Rx} = \frac{\sum_{i=1}^m I = \begin{cases} 1, & \text{if } abs(x_{i,k,s,Rx} - y_{i,k,s,Rx}) < 0.15 * x_{i,k,s,Rx} \\ 0, & \text{otherwise} \end{cases}}{m},$$

where a larger  $Score_{k,s,Rx}$  represents higher similarity between the read and the reference sequence. The normalized scores of each read is then defined as:

$$Score_{k,s,R} = Score_{k,s,R_a} / Score_{k,s,R_o} - 1,$$

#### VaPoR Score Calculation:

With a score assigned to each read spanning through the predicted structural variants, the VaPoR score is summarized as:

$$Score_{k,s} = \frac{\sum_{R=1}^n I = \begin{cases} 1, & \text{if } Score_{k,s,R} > 0 \\ 0, & \text{otherwise} \end{cases}}{n}$$

to represent the proportion of long reads supporting predicted structure.

The highest supportive score ( $\max(Score_{k,s,R})$ ) is also reported as a reference for users to meet the specific requirement of their study design, for which we recommend 0.1 as the cutoff.

#### Genotype Assessment:

The genotype and corresponding likelihood of a predicted SV is assessed by VaPoR using a method previously described for SNP genotyping [21]. Based on the assumption of two alleles per genomic site and  $k$  long reads adopted for the assessment, out of which  $j$  ( $j \leq k$ ) reads were assigned with a non-positive score, then the log likelihood of a particular genotype  $g$  can be estimate as:

$$l_g = -k * \log(2) + \sum_{i=1}^j \log((2 - g)\epsilon_i + g(1 - \epsilon_i)) + \sum_{i=j+1}^k \log((2 - g)(1 - \epsilon_i) + g\epsilon_i)$$

The error rate ( $\epsilon_i$ ) was estimated as the proportion of negative reads across the homozygous alternative events and the positives across the homozygous reference, which is estimated to be 5% across the 1000 Genomes samples. The genotype with the highest likelihood is reported as the estimated genotype, with the second largest likelihood in  $-\log_{10}$  normalized scale reported as the genotype quality score.

#### Flexible window size:

By default, VaPoR uses a window size of 10bp and requires an exact match between sequences, though these can be changed to user-defined parameters. However, many regions of the genome contain repetitive sequences resulting in an abundance of spurious matches in the recurrence matrix, thus introducing bias to the assessment. To address this, VaPoR adopts a quality control step by iteratively assessing the reference sequence against itself and tabulating the proportion of matches along the diagonal. The window size initially starts at 10bp and iteratively increases by 10bp until either (a) the proportion of matches on the diagonal exceeds 40% and the current window size is kept or (b) the

1  
2  
3  
4 window size exceeds 40bp whereby the event will be labeled as ‘non-assessable and excluded from the  
5  
6 evaluation.

## 9 **Availability and Requirements**

10  
11 Project name: VaPoR

12  
13 Project home page: <https://github.com/millslab/vapor>

14  
15 Operating systems: Linux, OS X

16  
17 Programming languages: Python, R

18  
19 Other requirements: Python v2.7.8+, rpy2, HTSeq, samtools v0.19+, pyfasta v0.5.2+, and pysam  
20  
21 0.9.1.4+.

22  
23 An archival copy of the code on github, alignments, structural variants records and other supplemental  
24  
25 data are also available via the *GigaScience* repository, GigaDB [18].

## 26 27 **Acknowledgements**

28  
29 We thank the Human Genome Structural Variation Consortium (HGSVC) for generating and providing  
30  
31 the deep PacBio sequencing. We also thank Yuanfang Guan and Kerby Shedden for discussions over  
32  
33 specific statistical considerations.

## 34 35 **Funding**

36  
37 This work was supported by the National Institutes of Health [R01HG007068]. AMW was supported by  
38  
39 the Genome Science Training Program at the University of Michigan [5T32HG000040]

## 40 41 **Authors’ contributions**

42  
43 XZ designed the algorithm, wrote the program, comparatively benchmarked the different algorithms,  
44  
45 and wrote the manuscript. AMW generated simulated data, aided in assessment testing, and revised the  
46  
47 manuscript. REM conceived the study, modified the algorithm, and revised the manuscript. All authors  
48  
49 read and approved the final manuscript.

1  
2  
3  
4  
5  
6  
7  
8  
9  
10  
11  
12  
13  
14  
15  
16  
17  
18  
19  
20  
21  
22  
23  
24  
25  
26  
27  
28  
29  
30  
31  
32  
33  
34  
35  
36  
37  
38  
39  
40  
41  
42  
43  
44  
45  
46  
47  
48  
49  
50  
51  
52  
53  
54  
55  
56  
57  
58  
59  
60  
61  
62  
63  
64  
65

**Competing interests**

None declared.

1  
2  
3  
4 **REFERENCES**  
5  
6  
7  
8

- 9 1. Brand H, Pillalamarri V, Collins RL, Eggert S, O'Dushlaine C, Braaten EB, et al. Cryptic and  
10 complex chromosomal aberrations in early-onset neuropsychiatric disorders. *Am J Hum*  
11 *Genet.* 2014;95 4:454-61. doi:10.1016/j.ajhg.2014.09.005.  
12 2. Chiang C, Jacobsen JC, Ernst C, Hanscom C, Heilbut A, Blumenthal I, et al. Complex  
13 reorganization and predominant non-homologous repair following chromosomal breakage  
14 in karyotypically balanced germline rearrangements and transgenic integration. *Nature*  
15 *Genetics.* 2012;44 4:390-U195. doi:10.1038/ng.2202.  
16 3. Layer RM, Chiang C, Quinlan AR and Hall IM. LUMPY: a probabilistic framework for  
17 structural variant discovery. *Genome Biol.* 2014;15 6:R84. doi:10.1186/gb-2014-15-6-r84.  
18 4. Rausch T, Zichner T, Schlattl A, Stutz AM, Benes V and Korbel JO. DELLY: structural variant  
19 discovery by integrated paired-end and split-read analysis. *Bioinformatics.* 2012;28  
20 18:i333-i9. doi:10.1093/bioinformatics/bts378  
21 18:i333-i9. doi:10.1093/bioinformatics/bts378  
22 23 bts378 [pii].  
24 5. Zhao X, Emery SB, Myers B, Kidd JM and Mills RE. Resolving complex structural genomic  
25 rearrangements using a randomized approach. *Genome Biology.* 2016;17  
26 doi:10.1186/s13059-016-0993-1.  
27 6. Chong Z, Ruan J, Gao M, Zhou W, Chen T, Fan X, et al. novoBreak: local assembly for  
28 breakpoint detection in cancer genomes. *Nat Methods.* 2017;14 1:65-7.  
29 doi:10.1038/nmeth.4084.  
30 7. Rhoads A and Au KF. PacBio Sequencing and Its Applications. *Genomics Proteomics*  
31 *Bioinformatics.* 2015;13 5:278-89. doi:10.1016/j.gpb.2015.08.002.  
32 8. Travers KJ, Chin CS, Rank DR, Eid JS and Turner SW. A flexible and efficient template format  
33 for circular consensus sequencing and SNP detection. *Nucleic Acids Res.* 2010;38 15:e159.  
34 doi:10.1093/nar/gkq543.  
35 9. Chaisson MJ, Huddleston J, Dennis MY, Sudmant PH, Malig M, Hormozdiari F, et al.  
36 Resolving the complexity of the human genome using single-molecule sequencing. *Nature.*  
37 2015;517 7536:608-11. doi:10.1038/nature13907.  
38 10. Pendleton M, Sebra R, Pang AW, Ummat A, Franzen O, Rausch T, et al. Assembly and diploid  
39 architecture of an individual human genome via single-molecule technologies. *Nat*  
40 *Methods.* 2015; doi:10.1038/nmeth.3454.  
41 11. Shi L, Guo Y, Dong C, Huddleston J, Yang H, Han X, et al. Long-read sequencing and de novo  
42 assembly of a Chinese genome. *Nature communications.* 2016;7:12065.  
43 doi:10.1038/ncomms12065.  
44 12. Koren S, Schatz MC, Walenz BP, Martin J, Howard JT, Ganapathy G, et al. Hybrid error  
45 correction and de novo assembly of single-molecule sequencing reads. *Nat Biotechnol.*  
46 2012;30 7:693-700. doi:10.1038/nbt.2280.  
47 13. Huddleston J, Chaisson MJ, Meltz Steinberg K, Warren W, Hoekzema K, Gordon DS, et al.  
48 Discovery and genotyping of structural variation from long-read haploid genome sequence  
49 data. *Genome Res.* 2016; doi:10.1101/gr.214007.116.  
50 14. Carvalho AB, Dupim EG and Goldstein G. Improved assembly of noisy long reads by k-mer  
51 validation. *Genome Res.* 2016;26 12:1710-20. doi:10.1101/gr.209247.116.  
52  
53  
54  
55  
56  
57  
58  
59  
60  
61  
62  
63  
64  
65

- 1  
2  
3  
4 15. Gibbs AJ and McIntyre GA. The diagram, a method for comparing sequences. Its use with  
5 amino acid and nucleotide sequences. *European journal of biochemistry*. 1970;16 1:1-11.  
6  
7 16. Consortium EP. An integrated encyclopedia of DNA elements in the human genome. *Nature*.  
8 2012;489 7414:57-74. doi:10.1038/nature11247.  
9  
10 17. Ono Y, Asai K and Hamada M. PBSIM: PacBio reads simulator--toward accurate genome  
11 assembly. *Bioinformatics*. 2013;29 1:119-21. doi:10.1093/bioinformatics/bts649.  
12  
13 18. Zhao X, Weber AM, Mills RE. Supporting data for "A recurrence based approach for  
14 validating structural variation using long-read sequencing technology".  
15 *GigaScience Database*. 2017. <http://dx.doi.org/10.5524/100325>  
16  
17 19. Sudmant PH, Rausch T, Gardner EJ, Handsaker RE, Abyzov A, Huddleston J, et al. An  
18 integrated map of structural variation in 2,504 human genomes. *Nature*. 2015;526  
19 7571:75-+. doi:10.1038/nature15394.  
20  
21 20. Genomes Project C, Auton A, Brooks LD, Durbin RM, Garrison EP, Kang HM, et al. A global  
22 reference for human genetic variation. *Nature*. 2015;526 7571:68-74.  
23 doi:10.1038/nature15393.  
24  
25 21. Robinson JT, Thorvaldsdottir H, Winckler W, Guttman M, Lander ES, Getz G, et al.  
26 Integrative genomics viewer. *Nat Biotechnol*. 2011;29 1:24-6. doi:nbt.1754 [pii]  
27 10.1038/nbt.1754.  
28  
29 22. Li H. A statistical framework for SNP calling, mutation discovery, association mapping and  
30 population genetical parameter estimation from sequencing data. *Bioinformatics*. 2011;27  
31 21:2987-93. doi:10.1093/bioinformatics/btr509  
32 btr509 [pii].  
33

## 34 **FIGURE LEGENDS**

35  
36 **Figure 1. Flowchart describing the VaPoR algorithm.** As input, the algorithm requires a set of  
37 structural variants in either VCF or BED format, a series of long reads and/or sequence contigs in BAM  
38 format, and the corresponding reference sequence. VaPoR then interrogates each variant individually at  
39 its corresponding reference location, assesses the quality of the region and assigns a score.  
40  
41  
42  
43  
44

45 **Figure 2. Accuracy of VaPoR on simulated heterozygous and homozygous SVs at varying degrees**  
46 **of sequence coverage and VaPoR score cut-offs.** The validation success rate is shown for simulated  
47 true positive (red) and false positive (blue) variants in both (a) heterozygous and (b) homozygous states  
48 from 2X to 50X genome coverage.  
49  
50  
51  
52

53 **Figure 3. Accuracy of VaPoR on simulated heterozygous and homozygous SVs across different SV**  
54 **types.** Receiver operator curves (ROC) are shown for simple deletions, duplications and inversions (a,b)  
55 as well as complex rearrangements including inverted duplications and deletion-inversion  
56 rearrangements (c,d).  
57  
58  
59  
60  
61  
62  
63  
64  
65

1  
2  
3  
4  
5  
6  
7  
8  
9  
10  
11  
12  
13  
14  
15  
16  
17  
18  
19  
20  
21  
22  
23  
24  
25  
26  
27  
28  
29  
30  
31  
32  
33  
34  
35  
36  
37  
38  
39  
40  
41  
42  
43  
44  
45  
46  
47  
48  
49  
50  
51  
52  
53  
54  
55  
56  
57  
58  
59  
60  
61  
62  
63  
64  
65

**Figure 4. Validation rate and breakpoint accuracy of VaPoR on the 1000 Genomes Projects phase 3 calls.** VaPoR was applied on 5 individuals with reported SVs as a truth set: HG00513, HG00731, HG00732, NA19238, NA19239. The validation rate of deletions (a) and insertions (b) are shown here across different cutoff scores for VaPoR. Robustness to breakpoint accuracy was assessed by deviating breakpoints from their actual positions across varying distances for deletions (c) and insertions (d).

**Figure 5. Validation and genotyping of assessed regions using VaPoR.** (a) Dot plot of reference genome (GRCh38) to an aligned long read in NA19239 (m150208\_160301\_42225\_c100732022550000001823141405141504\_s1\_p0/3831/0\_12148) for a reported inversion at position chr1:239952707-239953529. The signature is consistent with an inverted duplication structure. (b) Dot plot of a different read (m150216\_212941\_42225\_c100729442550000001823151505141565\_s1\_p0/106403/0\_13205) against the same location, consistent with a non-variant (reference) structure. (c) Distribution of VaPoR scores on all reported SVs on chr1 in samples HG00513, HG00731, HG00732, NA19238, NA19239, stratified by color (solid) and modeled with a Gaussian mixture model (dashed). (d) VaPoR scores of SV above now stratified by color as indicated in (c) for both reported inversion (red) and predicted inverted duplication (blue).



1  
2  
3  
4 **TABLES**  
5  
6  
7

8 **Table 1.** Sensitivity and false discovery rate of different SV types  
9

|         | deletion                       | insertion        | inversion        |
|---------|--------------------------------|------------------|------------------|
| Sample  | Sens/FDR                       | Sens/FDR         | Sens/FDR         |
| HG00513 | 0.96/0.00 (0.94 <sup>1</sup> ) | 0.80/0.05 (0.93) | 0.50/0.00 (0.71) |
| HG00731 | 0.94/0.00 (0.96)               | 0.85/0.07 (0.97) | 0.60/0.00 (1.00) |
| HG00732 | 0.92/0.00 (0.98)               | 0.92/0.08 (0.96) | 0.33/0.00 (0.86) |
| NA19238 | 0.90/0.00 (0.93)               | 0.88/0.10 (0.96) | 1.00/0.00 (1.00) |
| NA19239 | 0.87/0.02 (0.95)               | 0.73/0.09 (0.96) | 0.33/0.00 (1.00) |

10  
11  
12  
13  
14  
15  
16  
17  
18  
19  
20  
21  
22  
23  
24  
25  
26  
27  
28 <sup>1</sup>Proportion of SVs passed VaPoR QC, as listed in brackets, are counted  
29 for events on chr1 and chr2 together.  
30  
31  
32  
33  
34  
35  
36  
37  
38  
39  
40  
41  
42  
43  
44  
45  
46  
47  
48  
49  
50  
51  
52  
53  
54  
55  
56  
57  
58  
59  
60  
61  
62  
63  
64  
65

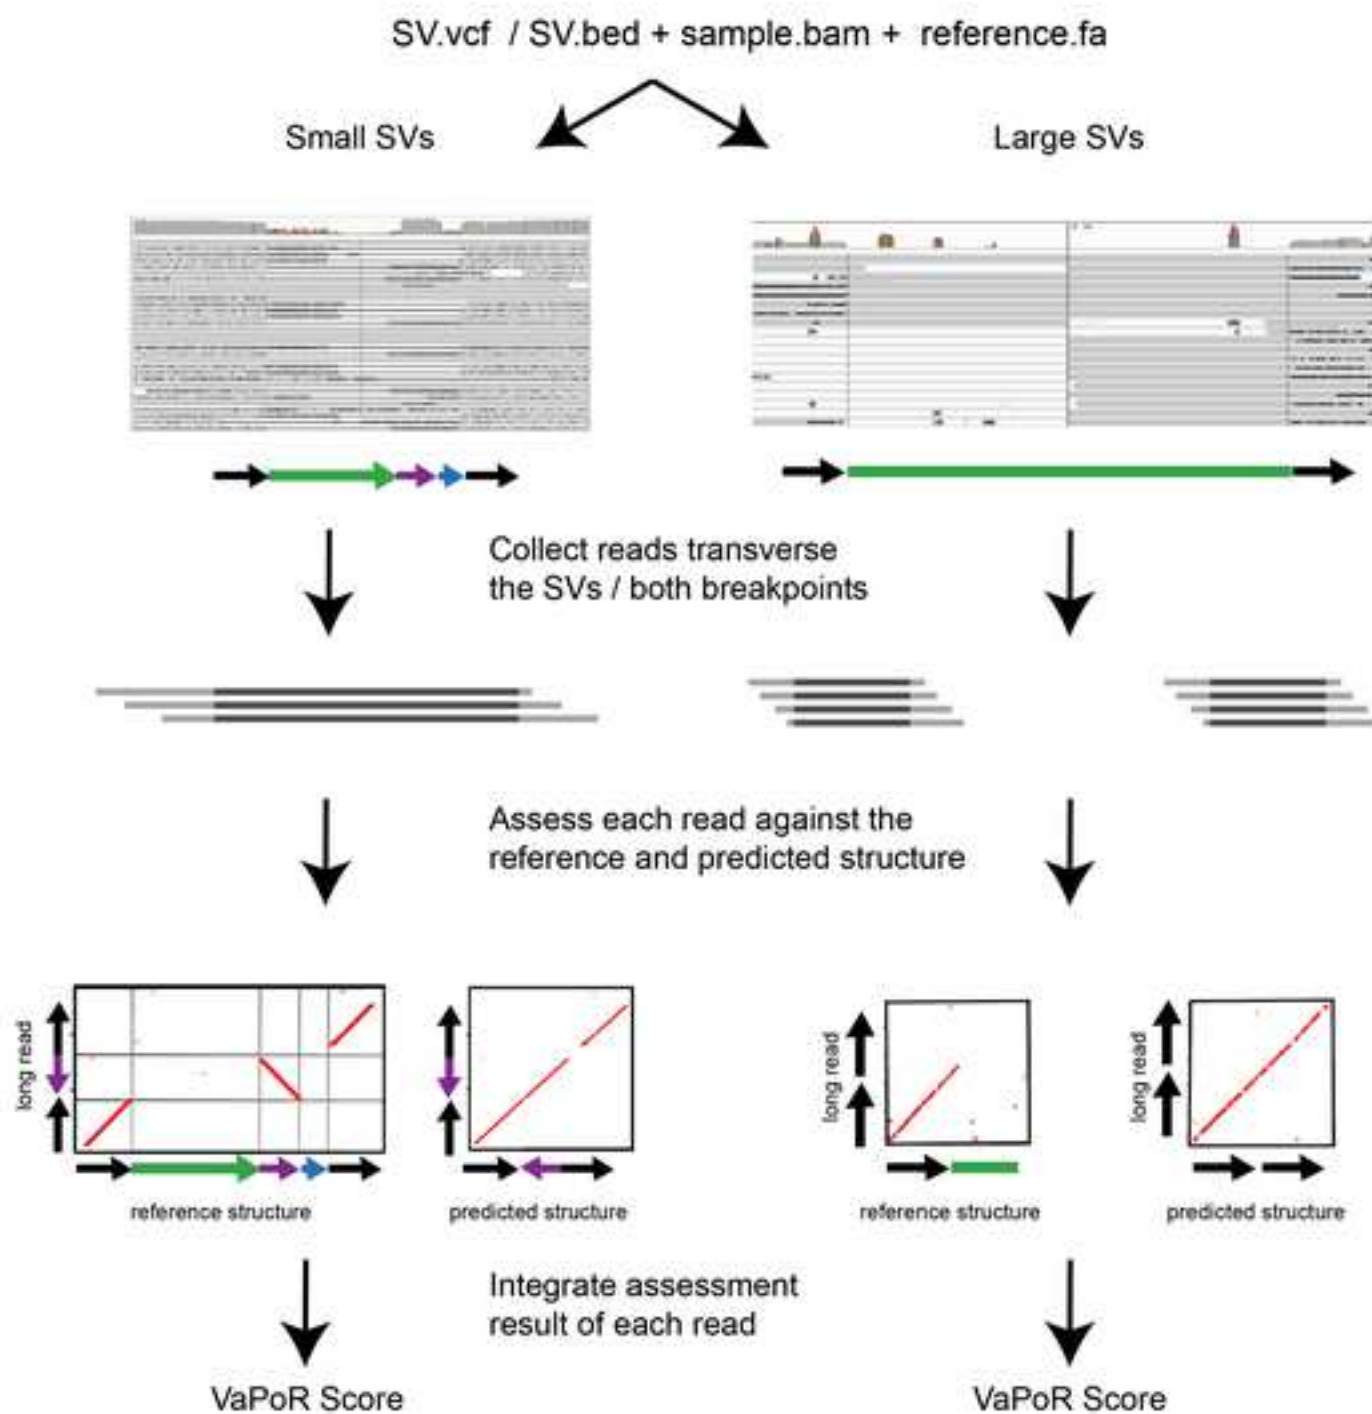

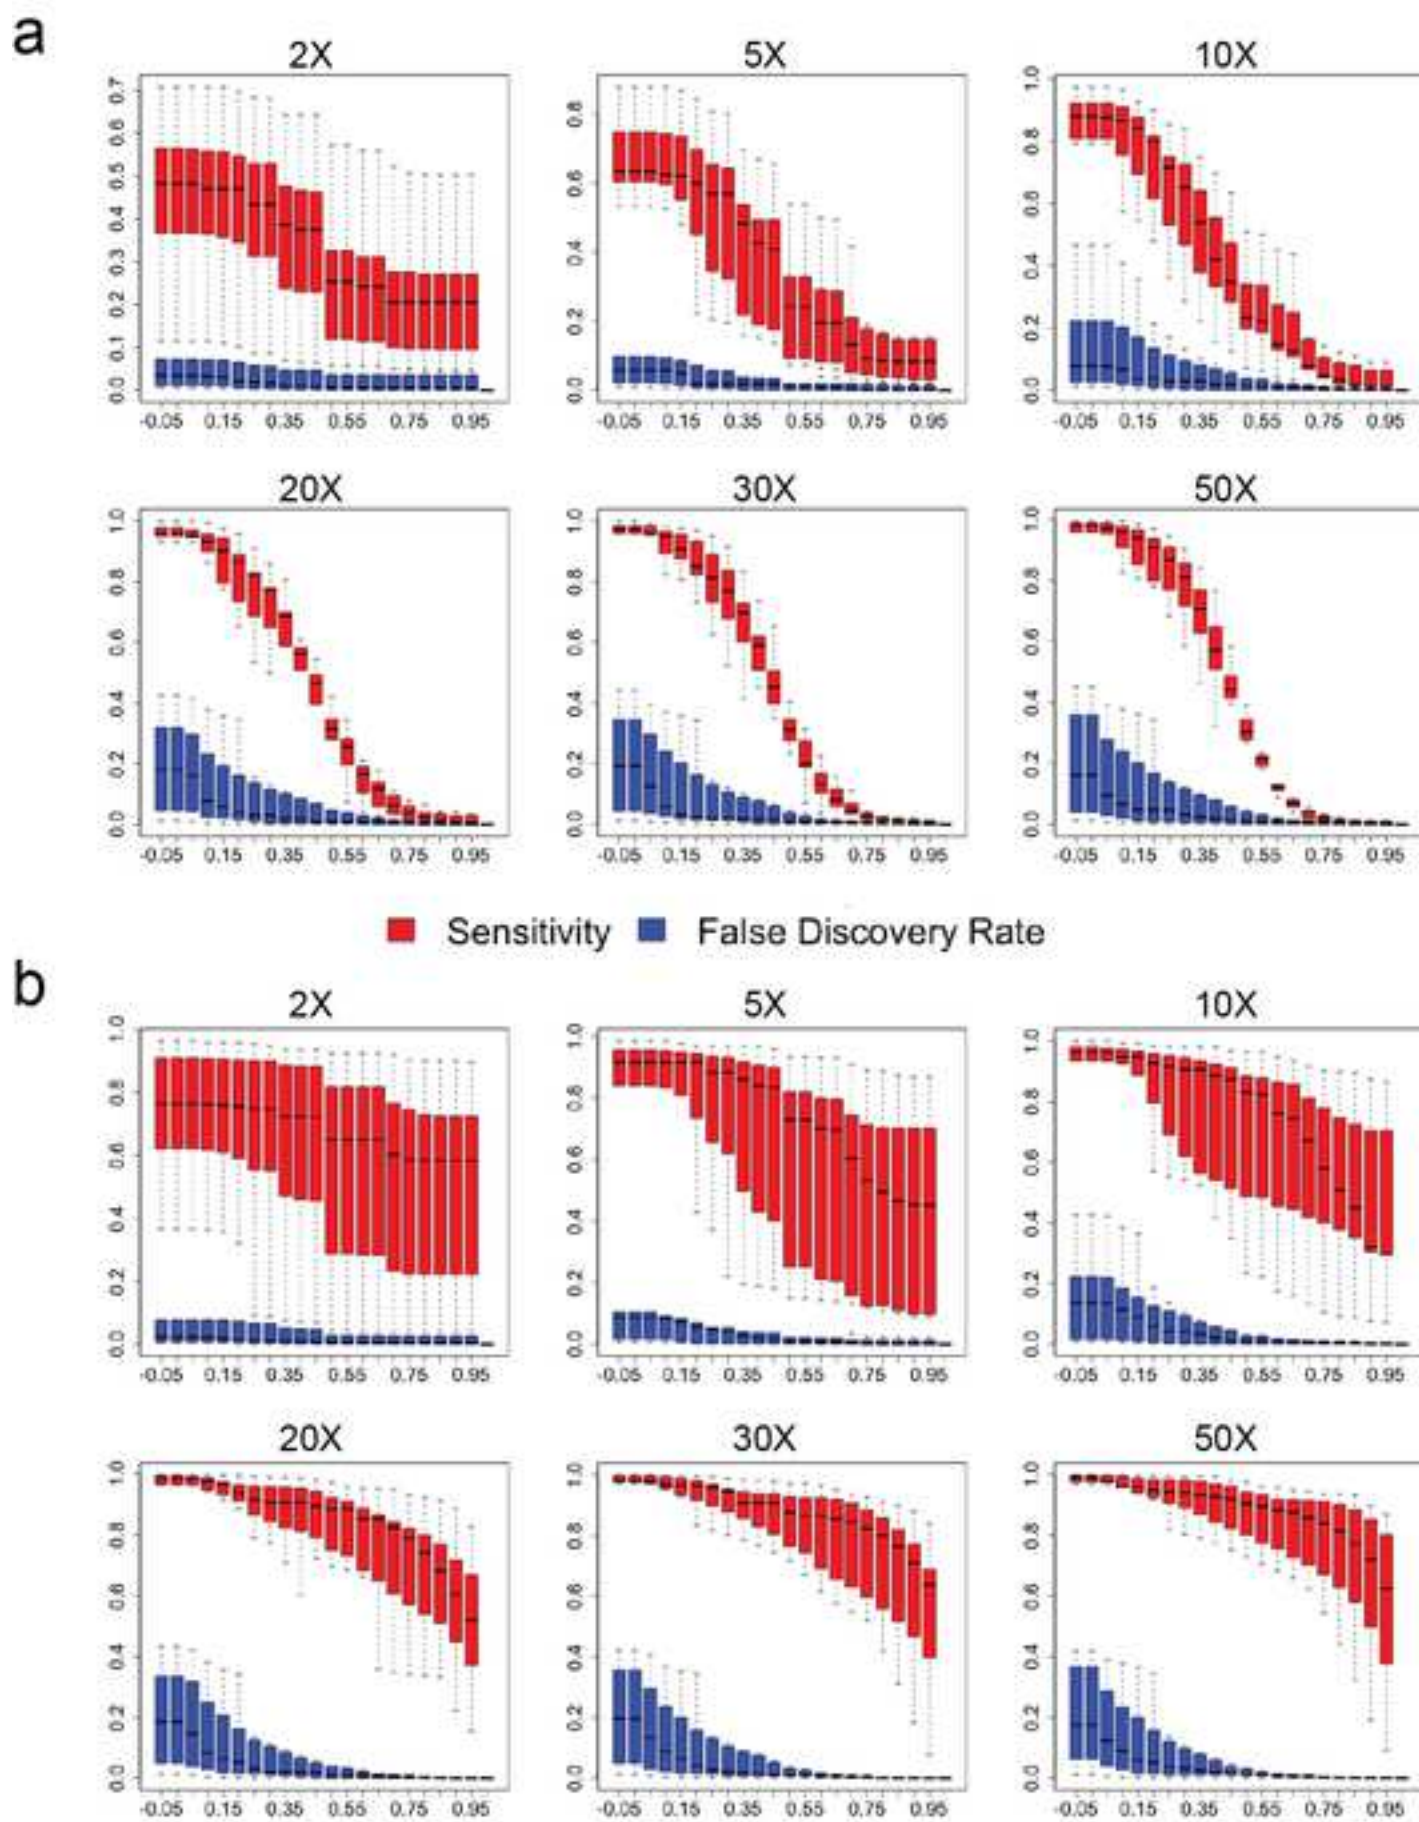

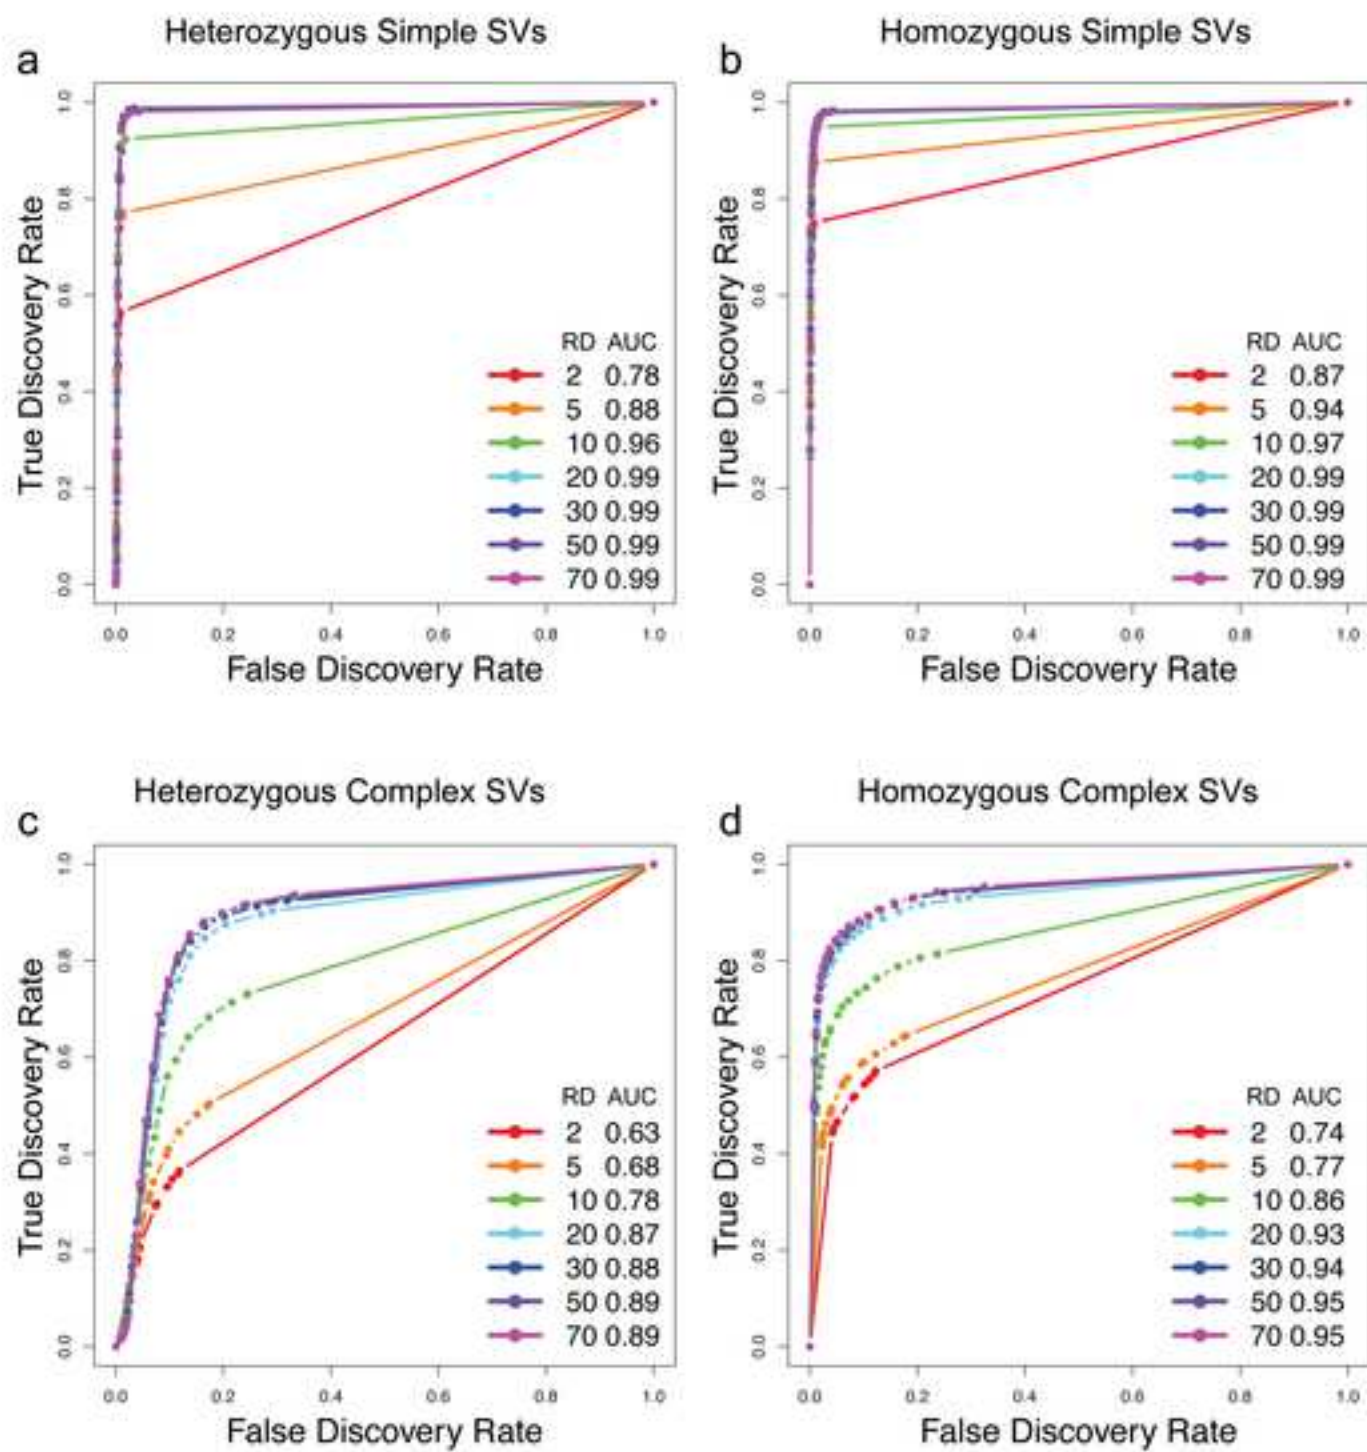

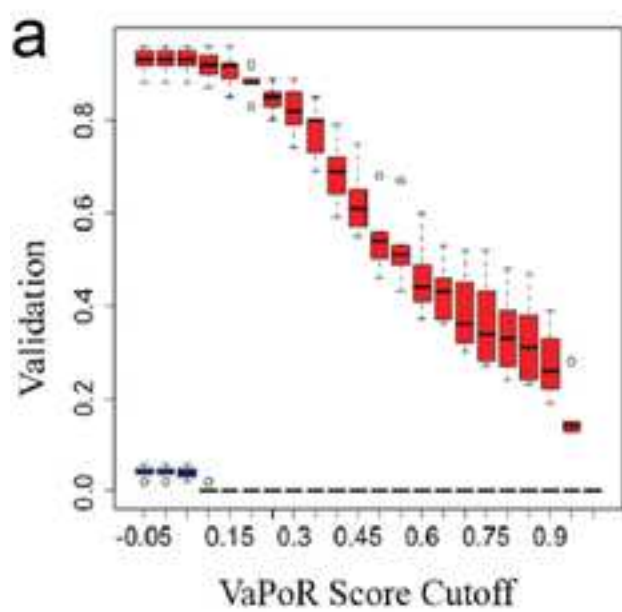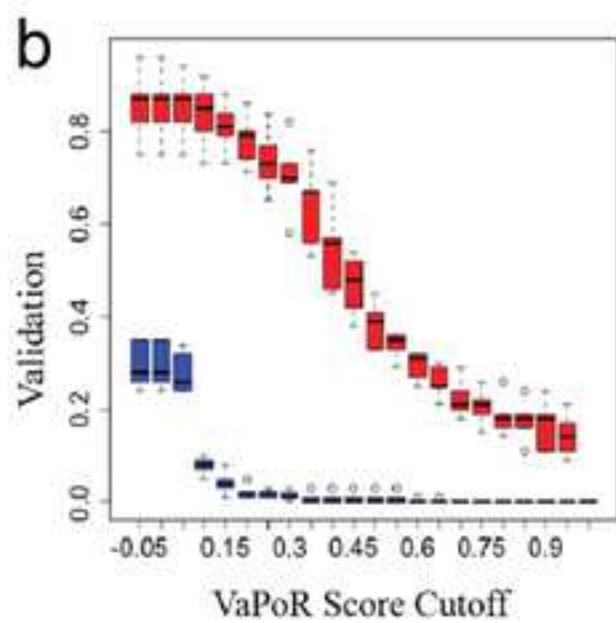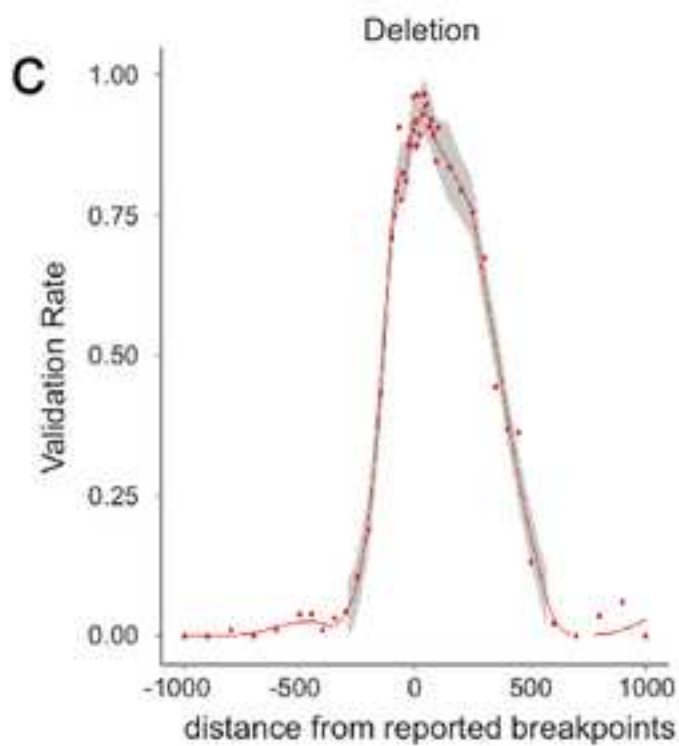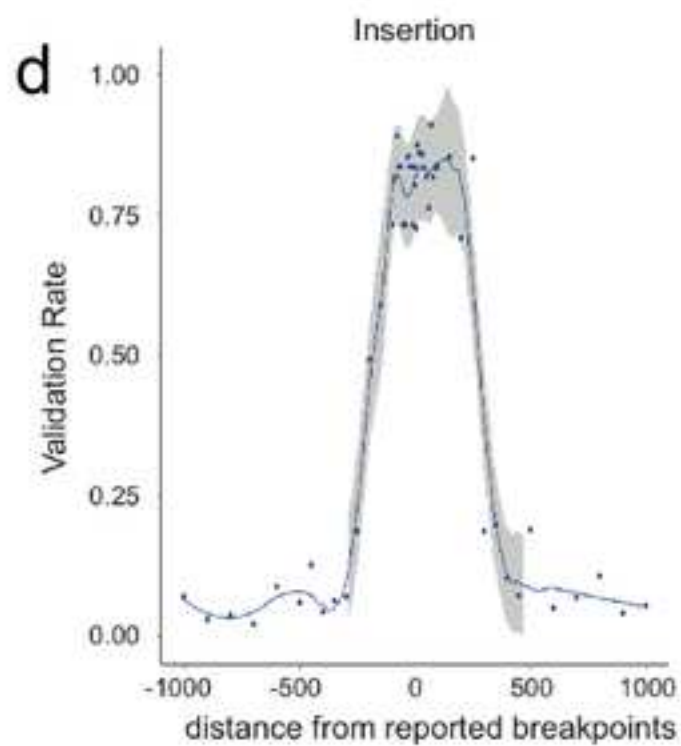



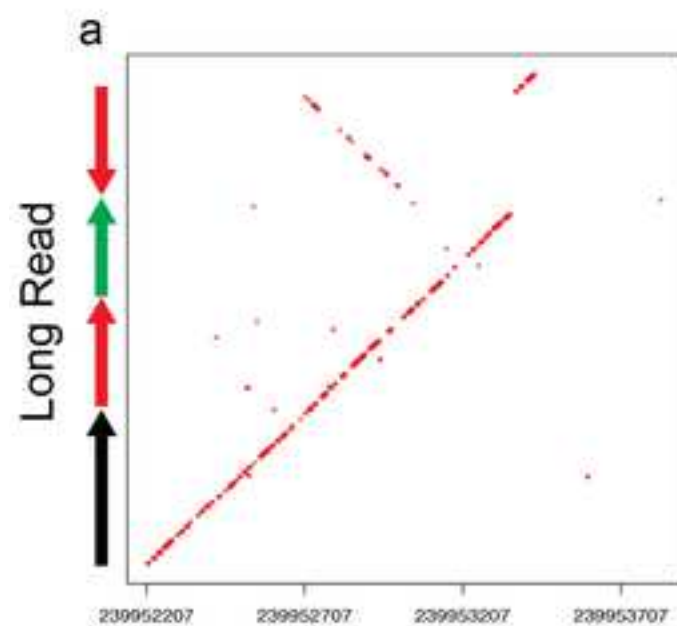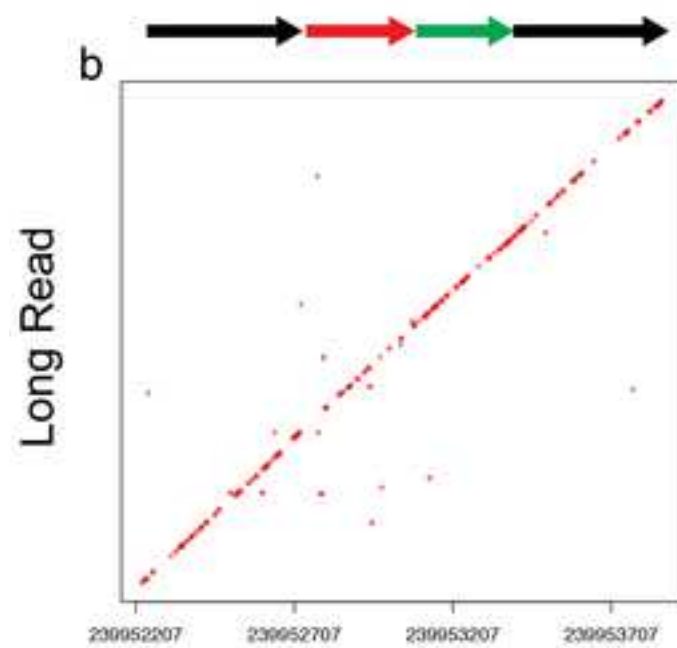

Chromosome 1

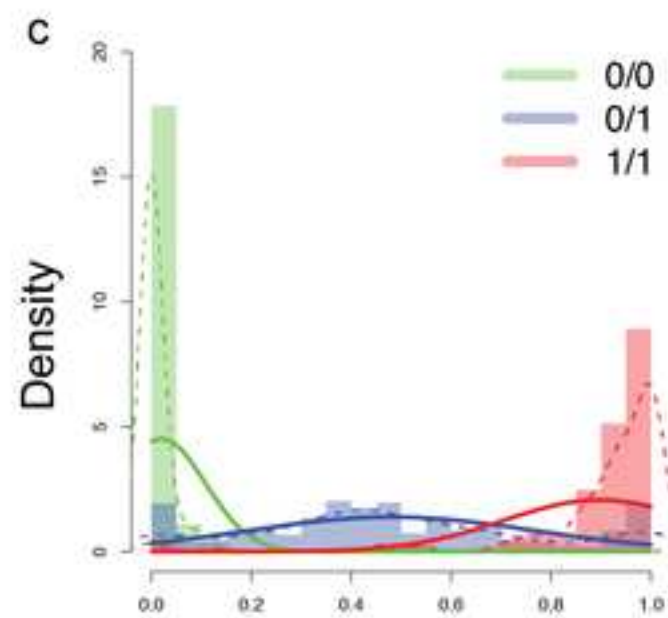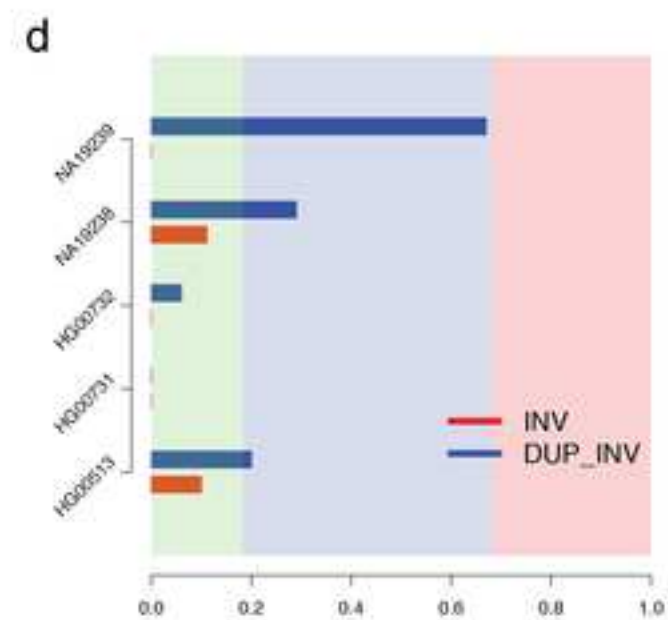

VaPoR Score



Click here to access/download  
**Supplementary Material**  
supplementary\_figures.docx



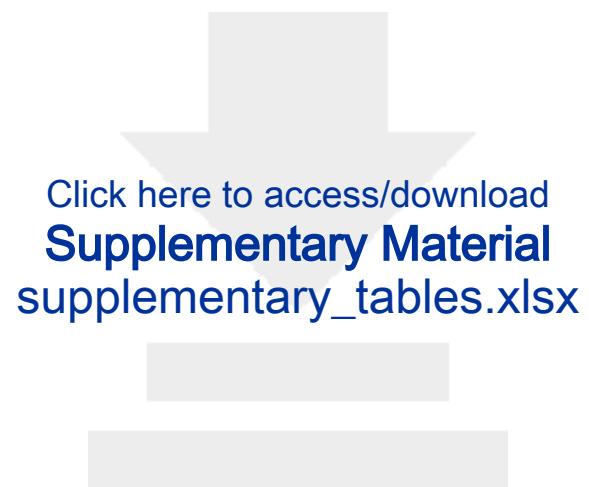

Click here to access/download  
**Supplementary Material**  
supplementary\_tables.xlsx
