# Supplementary material for: A recurrence-based approach for validating structural variation using long-read sequencing technology
Source: PubMed Central journal article supplement (PMC5737365; doi:10.1093/gigascience/gix061), 2017-07-19
Supplement: gix061_reviewer-1-report-(revision-1).pdf [file gix061_reviewer-1-report-%28revision-1%29.pdf]

## Reviewer Report

**Title:** A recurrence based approach for validating structural variation using long-read sequencing technology

**Version:** Revision 1      **Date:** 5/17/2017

**Reviewer name:** Ryan Layer

### Reviewer Comments to Author:

I think the paper is good to go. For what it is worth, I think Sup Figs 3 and 4 are the most informative and I would strongly suggest finding a way to move them to the main text.

### Level of Interest

Please indicate how interesting you found the manuscript: An article of importance in its field

### Quality of Written English

Please indicate the quality of language in the manuscript: Acceptable

### Declaration of Competing Interests

Please complete a declaration of competing interests, considering the following questions:

- Have you in the past five years received reimbursements, fees, funding, or salary from an organisation that may in any way gain or lose financially from the publication of this manuscript, either now or in the future?
- Do you hold any stocks or shares in an organisation that may in any way gain or lose financially from the publication of this manuscript, either now or in the future?
- Do you hold or are you currently applying for any patents relating to the content of the manuscript?
- Have you received reimbursements, fees, funding, or salary from an organization that holds or has applied for patents relating to the content of the manuscript?
- Do you have any other financial competing interests?
- Do you have any non-financial competing interests in relation to this paper?

If you can answer no to all of the above, write 'I declare that I have no competing interests' below. If your reply is yes to any, please give details below.

I declare that I have no competing interests

I agree to the open peer review policy of the journal. I understand that my name will be included on my report to the authors and, if the manuscript is accepted for publication, my named report including any attachments I upload will be posted on the website along with the authors' responses. I agree for my report to be made available under an Open Access Creative Commons CC-BY license (<http://creativecommons.org/licenses/by/4.0/>). I understand that any comments which I do not wish to be included in my named report can be included as confidential comments to the editors, which will not be published.

I agree to the open peer review policy of the journal
